# Supplementary material for: Is diagnostics of Benign Paroxysmal Positional Vertigo with a mechanical rotation chair superior to traditional manual diagnostics? A randomized controlled crossover study
Source: Frontiers journal article supplement (doi:10.3389/fneur.2024.1519837), 2024-12-06
Supplement: Data_Sheet_1.pdf [file Data_Sheet_1.pdf]

## Supplementary Material

### 1 Supplementary Tables

**Table A. Comparison of Included and Excluded Participants (n=279)**

|                             | Included<br>(n=224) |            | Excluded<br>(n=55) |            | <i>p-value</i> |
|-----------------------------|---------------------|------------|--------------------|------------|----------------|
|                             | <i>n</i>            | (%)        | <i>n</i>           | (%)        |                |
| Sex:                        |                     |            |                    |            |                |
| Female, n (%)               | 152                 | (67.9)     | 39                 | (72.2)     | 0.54           |
| Male, n (%)                 | 72                  | (32.1)     | 15                 | (27.8)     | -              |
| Age, years (mean, $\pm$ SD) | 58.2                | $\pm$ 15.8 | 60.9               | $\pm$ 15.4 | 0.25           |

The level of significance is  $p \leq 0.05$ . Please note that no significant difference exists between the included and excluded participants, indicating no selection bias concerning sex and age.

**Table B. BPPV Laterality**

|                                          | Right          |        | Left     |        | <i>p-value</i> |
|------------------------------------------|----------------|--------|----------|--------|----------------|
|                                          | <i>n</i>       | (%)    | <i>n</i> | (%)    |                |
| Diagnostic modality                      |                |        |          |        |                |
| Mechanical rotation chair(n=105)         | 53             | (50.5) | 41       | (39.5) | 0.00*          |
| Traditional manual diagnostics<br>(n=83) | 47             | (56.6) | 29       | (34.9) | 0.00*          |
|                                          | <i>p-value</i> |        |          |        |                |
|                                          | 0.16           |        | 0.02*    |        |                |

Significant *p*-values ( $p \leq 0.05$ ) are marked with an asterisk. Please note that both modalities have a significantly higher number of right-sided BPPV. Mechanical rotation chair diagnostics detected a significantly higher proportion of left-sided BPPV than traditional manual diagnostics.

**Table C. Results of BPPV Diagnostics (n=215)**

|                                                                         |                        | Mechanical Rotation Chair |           |           |           |           |           |           |           |           |           |           |           |           |                       |                        |                      | Total |
|-------------------------------------------------------------------------|------------------------|---------------------------|-----------|-----------|-----------|-----------|-----------|-----------|-----------|-----------|-----------|-----------|-----------|-----------|-----------------------|------------------------|----------------------|-------|
|                                                                         |                        | No BPPV                   | P-CAN dxt | P-CUP dxt | L-CAN dxt | L-CUP dxt | A-CAN dxt | A-CUP dxt | P-CAN sin | P-CUP sin | L-CAN sin | L-CUP sin | A-CAN sin | A-CUP sin | Unilateral multicanal | Bilateral single canal | Bilateral multicanal |       |
| Traditional Manual Diagnostics                                          | No BPPV                | 100                       | 6         | 1         | 0         | 4         | 0         | 0         | 12        | 0         | 2         | 4         | 0         | 0         | 1                     | 2                      | 0                    | 132   |
|                                                                         | P-CAN dxt              | 4                         | 26        | 0         | 0         | 0         | 0         | 0         | 0         | 1         | 0         | 0         | 0         | 0         | 5                     | 0                      | 0                    | 36    |
|                                                                         | P-CUP dxt              | 0                         | 1         | 2         | 0         | 0         | 0         | 0         | 0         | 0         | 0         | 0         | 0         | 0         | 0                     | 0                      | 0                    | 3     |
|                                                                         | L-CAN dxt              | 0                         | 0         | 0         | 0         | 0         | 0         | 0         | 0         | 0         | 0         | 0         | 0         | 0         | 0                     | 0                      | 0                    | 0     |
|                                                                         | L-CUP dxt              | 0                         | 0         | 0         | 0         | 4         | 0         | 0         | 0         | 0         | 0         | 0         | 0         | 0         | 1                     | 0                      | 0                    | 5     |
|                                                                         | A-CAN dxt              | 0                         | 0         | 0         | 0         | 0         | 1         | 0         | 0         | 0         | 0         | 0         | 0         | 0         | 0                     | 0                      | 0                    | 1     |
|                                                                         | A-CUP dxt              | 0                         | 0         | 0         | 0         | 0         | 0         | 0         | 0         | 0         | 0         | 0         | 0         | 0         | 0                     | 0                      | 0                    | 0     |
|                                                                         | P-CAN sin              | 3                         | 0         | 0         | 0         | 0         | 0         | 0         | 16        | 0         | 0         | 0         | 0         | 0         | 1                     | 3                      | 0                    | 23    |
|                                                                         | P-CUP sin              | 0                         | 0         | 0         | 0         | 0         | 0         | 0         | 0         | 1         | 0         | 0         | 0         | 0         | 0                     | 0                      | 0                    | 1     |
|                                                                         | L-CAN sin              | 1                         | 0         | 0         | 0         | 0         | 0         | 0         | 0         | 0         | 2         | 0         | 0         | 0         | 0                     | 0                      | 0                    | 3     |
|                                                                         | L-CUP sin              | 1                         | 0         | 0         | 0         | 0         | 0         | 0         | 0         | 0         | 0         | 0         | 0         | 0         | 0                     | 0                      | 0                    | 1     |
|                                                                         | A-CAN sin              | 0                         | 0         | 0         | 0         | 0         | 0         | 0         | 0         | 0         | 0         | 0         | 0         | 0         | 0                     | 0                      | 0                    | 0     |
|                                                                         | A-CUP sin              | 0                         | 0         | 0         | 0         | 0         | 0         | 0         | 0         | 0         | 0         | 1         | 0         | 0         | 0                     | 0                      | 0                    | 1     |
|                                                                         | Unilateral multicanal  | 0                         | 0         | 1         | 0         | 0         | 0         | 0         | 0         | 0         | 0         | 0         | 0         | 0         | 1                     | 0                      | 0                    | 2     |
|                                                                         | Bilateral single canal | 1                         | 0         | 0         | 0         | 0         | 0         | 0         | 0         | 0         | 0         | 0         | 0         | 0         | 0                     | 5                      | 0                    | 6     |
|                                                                         | Bilateral multicanal   | 0                         | 0         | 0         | 0         | 0         | 0         | 0         | 0         | 0         | 0         | 0         | 0         | 0         | 0                     | 1                      | 0                    | 1     |
| Total                                                                   |                        | 110                       | 33        | 4         | 0         | 8         | 1         | 0         | 28        | 2         | 4         | 5         | 0         | 0         | 9                     | 11                     | 0                    | 215   |
| Total number of BPPV with mechanical rotation chair diagnostics: n= 105 |                        |                           |           |           |           |           |           |           |           |           |           |           |           |           |                       |                        |                      |       |

Table showing the distribution of BPPVs between traditional manual diagnostics and mechanical rotation chair diagnostics.

CAN: Canalolithiasis; CUP: Cupulolithiasis; p: posterior; l: lateral; a: anterior.

Please note that the majority of BPPV cases are placed in the diagonal midline, indicating agreement between the two diagnostic modalities.

**Table D. Results of BPPV Diagnostics**

| Sufficient cooperation during traditional manual diagnostics (n=175)             |         |              |              |               |                   |                         |
|----------------------------------------------------------------------------------|---------|--------------|--------------|---------------|-------------------|-------------------------|
|                                                                                  |         | MRC          |              | Total         | p-value<br>0.02*  |                         |
|                                                                                  |         | BPPV         | No BPPV      |               |                   |                         |
| MD                                                                               | BPPV    | 58           | 7            | 65<br>(37.1)  | Accuracy<br>73.5% | (95% CI)<br>(67.6-79.4) |
|                                                                                  | No BPPV | 19           | 91           | 110<br>(62.9) |                   |                         |
|                                                                                  | Total   | 77<br>(44.0) | 98<br>(56.0) | 175<br>(100)  |                   |                         |
| Impaired but acceptable cooperation during traditional manual diagnostics (n=40) |         |              |              |               |                   |                         |
|                                                                                  |         | MRC          |              | Total         | p-value<br>0.01*  |                         |
|                                                                                  |         | BPPV         | No BPPV      |               |                   |                         |
| MD                                                                               | BPPV    | 15           | 3            | 18<br>(45.0)  | Accuracy<br>14.4% | (95% CI)<br>(9.7-19.1)  |
|                                                                                  | No BPPV | 13           | 9            | 22<br>(55.0)  |                   |                         |
|                                                                                  | Total   | 28<br>(70.0) | 12<br>(30.0) | 40<br>(100)   |                   |                         |
| Referred by a general practitioner (n=184)                                       |         |              |              |               |                   |                         |
|                                                                                  |         | MRC          |              | Total         | p-value<br>0.00*  |                         |
|                                                                                  |         | BPPV         | No BPPV      |               |                   |                         |
| MD                                                                               | BPPV    | 61           | 6            | 67<br>(36.4)  | Accuracy<br>77.2% | (95% CI)<br>(71.6-82.8) |
|                                                                                  | No BPPV | 25           | 92           | 117<br>(63.6) |                   |                         |
|                                                                                  | Total   | 86<br>(46.7) | 98<br>(53.2) | 184<br>(100)  |                   |                         |
| Referred by an otorhinolaryngologist clinic (n=31)                               |         |              |              |               |                   |                         |
|                                                                                  |         | MRC          |              | Total         | p-value<br>0.37   |                         |
|                                                                                  |         | BPPV         | No BPPV      |               |                   |                         |
| MD                                                                               | BPPV    | 12           | 4            | 16<br>(51.6)  | Accuracy<br>10.7% | (95% CI)<br>(6.6-14.8)  |
|                                                                                  | No BPPV | 7            | 8            | 15<br>(48.4)  |                   |                         |
|                                                                                  | Total   | 19<br>(61.3) | 12<br>(38.7) | 31<br>(100)   |                   |                         |
| MRC first - MD second (n=109)                                                    |         |              |              |               |                   |                         |
|                                                                                  |         | MRC          |              | Total         | p-value<br>0.09   |                         |
|                                                                                  |         | BPPV         | No BPPV      |               |                   |                         |
| MD                                                                               | BPPV    | 36           | 5            | 41<br>(37.6)  | Accuracy<br>43.8% | (95% CI)<br>(36.2-49.4) |
|                                                                                  | No BPPV | 12           | 56           | 68<br>(62.4)  |                   |                         |
|                                                                                  | Total   | 48<br>(44.0) | 61<br>(56.0) | 109<br>(100)  |                   |                         |
| MD first - MRC second (n=106)                                                    |         |              |              |               |                   |                         |
|                                                                                  |         | MRC          |              | Total         | p-value<br>0.00*  |                         |
|                                                                                  |         | BPPV         | No BPPV      |               |                   |                         |
| MD                                                                               | BPPV    | 37           | 5            | 42<br>(39.6)  | Accuracy<br>37.7% | (95% CI)<br>(31.2-44.2) |
|                                                                                  | No BPPV | 20           | 44           | 64<br>(60.4)  |                   |                         |
|                                                                                  | Total   | 57           | 49           | 106           |                   |                         |

|        |        |       |
|--------|--------|-------|
| (53.8) | (46.2) | (100) |
|--------|--------|-------|

MRC: mechanical rotation chair; MD: traditional manual diagnostics.

Results are expressed as n (%). Percentages refer to the total sample in each group.

Significant p-values (p-value  $\leq 0.05$ ) are marked with an asterisk. Please note that MRC diagnostics was significantly more sensitive in diagnosing BPPV in all groups except those referred by ENTs and those who underwent examination with an MRC first.

**Table E. Comparison of BPPV by Referrals**

|                                       | General Practitioner<br>(n=184) |        | ENT clinics<br>(n=31) |        | p-value |
|---------------------------------------|---------------------------------|--------|-----------------------|--------|---------|
|                                       | n                               | (%)    | n                     | (%)    |         |
| <b>Mechanical rotation chair</b>      |                                 |        |                       |        |         |
| BPPV total                            | 86                              | (46.7) | 19                    | (61.3) | 0.13    |
| BPPV localization:                    | n=86                            |        | n=19                  |        |         |
| Single canal BPPV                     | 71                              | (82.6) | 14                    | (73.7) | 0.49    |
| Posterior BPPV                        | 60                              | (69.8) | 7                     | (36.8) | 0.25    |
| Lateral BPPV                          | 10                              | (11.6) | 7                     | (36.8) | 0.01*   |
| Anterior BPPV                         | 1                               | (1.2)  | 0                     | (0.0)  | -       |
| Multicanal BPPV (≥2 SCC):             | 15                              | (17.4) | 5                     | (26.3) | 0.18    |
| Non-posterior BPPV                    | 26                              | (30.2) | 12                    | (63.2) | 0.00*   |
| <b>Traditional manual diagnostics</b> |                                 |        |                       |        |         |
| BPPV total                            | 67                              | (36.4) | 16                    | (51.6) | 0.11    |
| BPPV localization:                    | n=67                            |        | n=16                  |        |         |
| Single canal BPPV                     | 60                              | (89.6) | 14                    | (87.5) | 0.18    |
| Posterior BPPV                        | 53                              | (79.1) | 10                    | (62.5) | 0.70    |
| Lateral BPPV                          | 6                               | (9.0)  | 3                     | (18.8) | 0.12    |
| Anterior BPPV                         | 1                               | (1.5)  | 1                     | (6.3)  | 0.27    |
| Multicanal BPPV (≥2 SCC):             | 7                               | (10.5) | 2                     | (12.5) | 0.62    |
| Non-posterior BPPV                    | 14                              | (20.9) | 6                     | (37.5) | 0.05    |

ENT: otorhinolaryngologist; CAN: canalolithiasis; CUP: cupulolithiasis; SCC: semicircular canal.

Significant p-values (p  $\leq 0.05$ ) are marked with an asterisk. Please note that significantly more participants were diagnosed with non-posterior BPPV with a mechanical rotation chair when referred by ENTs.

**Table F. Comparison of BPPV in First and Second Examination (n=215)**

|                                              | First examination |        | Second examination |        | p-value |
|----------------------------------------------|-------------------|--------|--------------------|--------|---------|
|                                              | n                 | (%)    | n                  | (%)    |         |
| <b>Mechanical rotation chair diagnostics</b> | n=109             |        | n=106              |        |         |
| BPPV total                                   | 48                | (44.0) | 57                 | (53.8) | 0.15    |
| BPPV subtype and localization:               | n=48              |        | n=57               |        |         |
| Single canal BPPV                            | 37                | (77.1) | 48                 | (84.2) | 0.09    |
| Posterior BPPV total                         | 28                | (58.3) | 39                 | (68.4) | 0.08    |
| Lateral BPPV total                           | 8                 | (16.7) | 9                  | (15.8) | 0.75    |
| Anterior BPPV total                          | 1                 | (2.08) | 0                  | (0.0)  | -       |
| Multicanal BPPV ( $\geq 2$ SCC):             | 11                | (22.9) | 9                  | (15.8) | 0.69    |
| Non-posterior BPPV                           | 20                | (41.7) | 18                 | (31.6) | 0.79    |
| <b>Traditional manual diagnostics</b>        | n=106             |        | n=109              |        |         |
| BPPV total                                   | 42                | (39.6) | 41                 | (37.6) | 0.76    |
| BPPV subtype and localization:               | n=42              |        | n=41               |        |         |
| Single canal BPPV                            | 41                | (97.6) | 41                 | (80.5) | 0.20    |
| Posterior BPPV total                         | 35                | (83.3) | 28                 | (68.3) | 0.24    |
| Lateral BPPV total                           | 5                 | (11.9) | 4                  | (9.8)  | 0.75    |
| Anterior BPPV total                          | 1                 | (2.4)  | 1                  | (2.4)  | -       |
| Multicanal BPPV ( $\geq 2$ SCC):             | 1                 | (2.4)  | 8                  | (19.5) | 0.04*   |
| Non-posterior BPPV                           | 7                 | (16.7) | 13                 | (31.7) | 0.18    |

CAN: canalolithiasis; CUP: cupulolithiasis; SCC: semicircular canal

Significant p-values ( $p \leq 0.05$ ) are marked with an asterisk. Please note that there are no significant differences between findings (except multicanal BPPV with traditional manual diagnostics, all represented by bilateral posterior BPPV) in the modalities when performed first or second in the study.

**Table G. Diagnostic Profile of Mechanical Rotation Chair (n=215)**

|                              | Mechanical rotation chair diagnostics compared to traditional manual diagnostics |             |             |             |      |             |      |             |
|------------------------------|----------------------------------------------------------------------------------|-------------|-------------|-------------|------|-------------|------|-------------|
|                              | Sensitivity                                                                      |             | Specificity |             | PPV  |             | NPV  |             |
|                              | %                                                                                | (95% CI)    | %           | (95% CI)    | %    | (95% CI)    | %    | (95% CI)    |
| All BPPV                     | 88.0                                                                             | (79.0-94.1) | 75.8        | (67.5-82.8) | 69.5 | (59.8-78.1) | 90.9 | (83.9-95.6) |
| Posterior BPPV               | 74.6                                                                             | (62.1-95.8) | 86.8        | (80.4-91.8) | 70.1 | (57.7-80.7) | 89.2 | (83.0-93.7) |
| Non-posterior BPPV           | 80.0                                                                             | (56.3-94.3) | 88.7        | (93.4-92.8) | 42.1 | (26.3-59.2) | 97.7 | (94.3-99.4) |
| Referred by:                 |                                                                                  |             |             |             |      |             |      |             |
| General practitioner (n=184) | 91.0                                                                             | (81.5-96.6) | 78.6        | (70.1-85.7) | 70.9 | (60.1-80.2) | 93.9 | (87.1-97.7) |
| ENT clinics (n=31)           | 75.0                                                                             | (47.6-92.7) | 53.3        | (26.6-78.7) | 63.2 | (38.4-83.7) | 66.7 | (34.9-90.1) |
| When MRC was performed:      |                                                                                  |             |             |             |      |             |      |             |
| First                        | 87.8                                                                             | (73.8-95.9) | 82.4        | (71.2-90.5) | 75.0 | (60.4-86.4) | 91.8 | (81.9-97.3) |
| Second                       | 88.1                                                                             | (74.4-96.0) | 68.8        | (55.9-79.8) | 64.9 | (51.1-77.1) | 89.8 | (77.8-96.6) |

MRC: mechanical rotation chair (index test); MD: traditional manual diagnostics (reference test); PPV: positive predictive value; NPV: negative predictive value; ENT: otorhinolaryngologist

**Table H. Comparison of Study Periods (n=215)**

|                                 | First study period<br>(n=108) |            | Last study period<br>(n=107) |            | <i>p-value</i> |
|---------------------------------|-------------------------------|------------|------------------------------|------------|----------------|
|                                 | <i>n</i>                      | <i>(%)</i> | <i>n</i>                     | <i>(%)</i> |                |
| Diagnosed BPPV total            | 60                            | (55.6)     | 55                           | (51.4)     | 0.54           |
| Diagnosed BPPV with MRC         | 54                            | (50.0)     | 51                           | (47.7)     | 0.73           |
| Diagnosed BPPV with MD          | 43                            | (39.8)     | 40                           | (37.4)     | 0.71           |
| <i>BPPV with the use of MRC</i> |                               |            |                              |            |                |
|                                 | <i>n=54</i>                   |            | <i>n=51</i>                  |            |                |
| Posterior BPPV                  | 36                            | (66.7)     | 31                           | (60.8)     | 0.49           |
| Non-posterior BPPV              | 18                            | (33.3)     | 20                           | (39.2)     | 0.70           |
| <i>BPPV with traditional MD</i> |                               |            |                              |            |                |
|                                 | <i>n=43</i>                   |            | <i>n=40</i>                  |            |                |
| Posterior BPPV                  | 33                            | (76.7)     | 30                           | (75.0)     | 0.69           |
| Non-posterior BPPV              | 10                            | (23.3)     | 10                           | (25.0)     | 0.98           |

MRC: mechanical rotation chair; MD: manual diagnostics

The level of significance is  $p \leq 0.05$ . Please note that there was no significant difference in the findings between the study periods, indicating that the examiner's learning curve did not influence the results.

**Table I. Second Review of Eye Recordings**

|                                        | Overall agreement |                 | Cohen's kappa |                 |
|----------------------------------------|-------------------|-----------------|---------------|-----------------|
|                                        | <i>%</i>          | <i>(95% CI)</i> |               | <i>(95% CI)</i> |
| <i>Examination with the use of MRC</i> |                   |                 |               |                 |
| BPPV or no BPPV                        | 89.8              | (85.7-93.8)     | 0.79          | (0.66-0.93)     |
| Posterior BPPV                         | 94.0              | (90.8-97.1)     | 0.86          | (0.72-0.99)     |
| Non-posterior BPPV                     | 94.9              | (91.9-97.8)     | 0.81          | (0.67-0.94)     |
| Study periods                          |                   |                 |               |                 |
| First study period (n=108)             | 84.3              | (77.4-91.1)     | 0.69          | (0.51-0.87)     |
| Second study period (n=107)            | 95.3              | (91.3-99.3)     | 0.91          | (0.72-1.10)     |
| <i>Examination with traditional MD</i> |                   |                 |               |                 |
| BPPV or no BPPV                        | 92.5              | (88.5-95.7)     | 0.84          | (0.70-0.96)     |
| Posterior BPPV                         | 93.5              | (90.1-96.8)     | 0.84          | (0.71-0.97)     |
| Non-posterior BPPV                     | 96.3              | (93.7-98.8)     | 0.75          | (0.61-0.88)     |
| Study periods                          |                   |                 |               |                 |
| First study period (n=108)             | 87.0              | (80.7-93.4)     | 0.74          | (0.55-0.92)     |
| Second study period (n=107)            | 97.2              | (94.1-1.00)     | 0.94          | (0.75-1.13)     |

The second review was performed by an expert blinded to the examiner's clinical conclusion.

MRC: mechanical rotation chair; MD: manual diagnostics.

Please note the tendency of lower Cohen's kappa with diagnostics of non-posterior BPPV. Also, note the higher Cohen's kappa in participants from the second study period compared to the first. All  $p$ -values for Cohen's kappa are  $\leq 0.05$ , indicating that the agreement between the modalities is beyond chance.
